# Supplementary material for: Temperature Dependence of Reaction Kinetics in a Hybrid GaAs Solar–Fuel Cell Device
Source: PubMed Central journal article supplement (PMC11498716; doi:10.1021/acs.jpclett.4c02018), 2024-09-10
Supplement: jz4c02018_si_001.pdf [file jz4c02018_si_001.pdf]

## Supplementary materials

### Temperature Dependence of Reaction Kinetics in a Hybrid GaAs Solar-Fuel Cell Device

Mahdi Alizadeh<sup>1\*</sup>, Shengyang Li<sup>2</sup>, Seyed Ahmad Shahahmadi<sup>1</sup>, Jani Oksanen<sup>1</sup>

<sup>1</sup>Engineered Nanosystems Group, School of Science, Aalto University, Tietotie 1, Espoo, 02150, Finland

<sup>2</sup>Department of Chemistry, China Agricultural University, Beijing 100193, China

\*Corresponding author: [mahdi.alizadehkouzehrash@aalto.fi](mailto:mahdi.alizadehkouzehrash@aalto.fi)

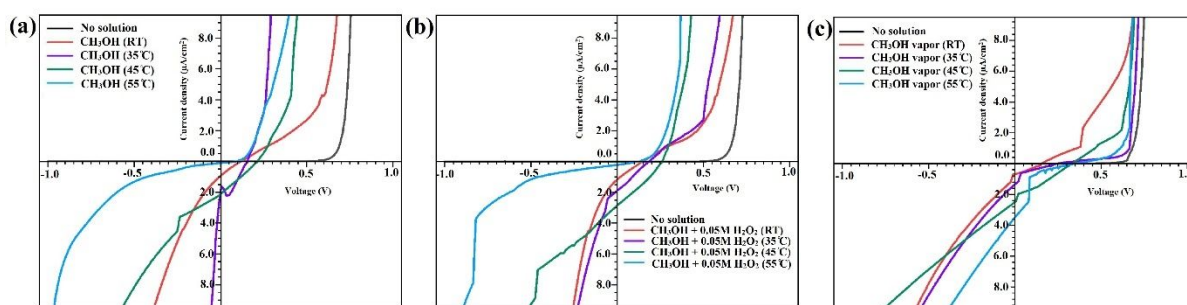

Figure S1: Linear J–V curves of the GaAs/GaInP cell in the dark under different temperatures with and without exposure to CH<sub>3</sub>OH (a), CH<sub>3</sub>OH+(0.05 M) H<sub>2</sub>O<sub>2</sub> (b) and CH<sub>3</sub>OH vapor (c).

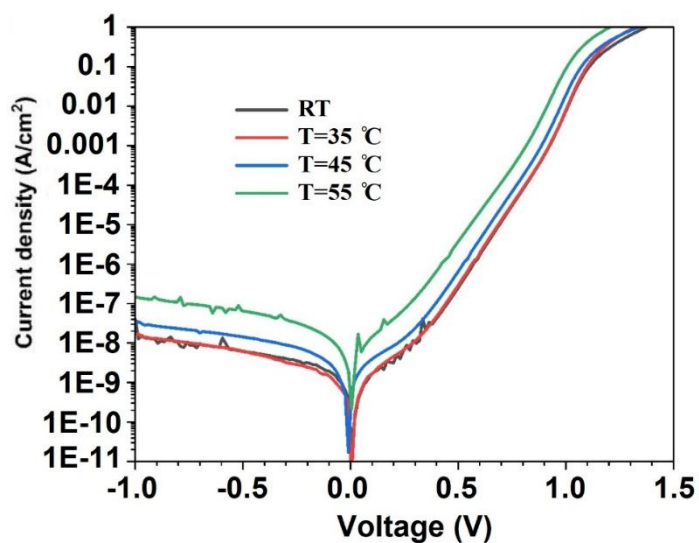

Figure S2: J–V curves of the GaAs/GaInP cell in the dark under different temperatures and without exposure to solution.

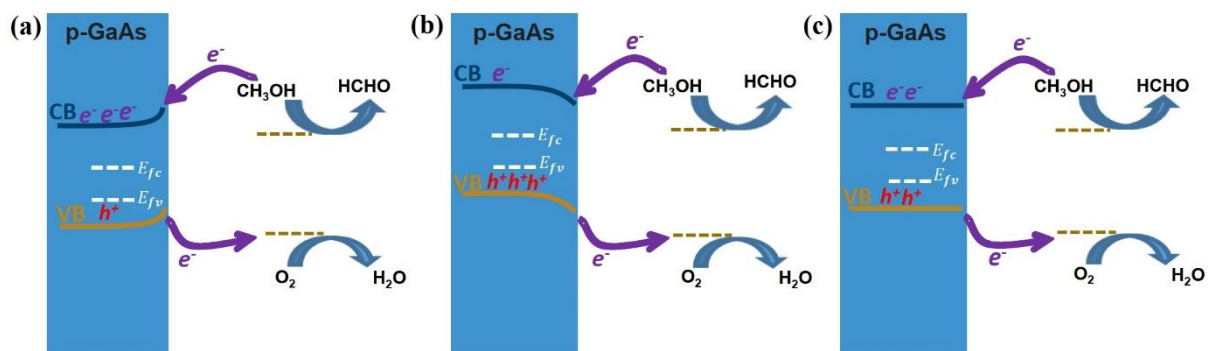

Figure S3: Schematic illustration of the band diagrams for upward band bending (a), downward band bending (b) and flat band conditions (c) and corresponding charge injections from the redox reactions.
